# Supplementary material for: Ephemeroptera (Mayflies) Assemblages and Environmental Variation along Three Streams Located in the Dry-Hot Valleys of Baima Snow Mountain, Yunnan, Southwest China
Source: MDPI journal article supplement (doi:10.3390/insects12090775), 2021-08-29
Supplement: s1 [file s1]

**Table S1.** Results of the post-hoc TukeyHSD and Dunn tests for inter-group differences for each environmental component.

| Environmental Factors               | Streams | Diff       | Lwr        | Upr        | <i>p</i> Value |
|-------------------------------------|---------|------------|------------|------------|----------------|
| Total dissolved solid               | SR-BZL  | 84.19470   | 35.88243   | 132.50697  | < <b>0.001</b> |
|                                     | YR-BZL  | -1.49697   | -49.80924  | 46.81530   | 0.996          |
|                                     | YR-SR   | -85.69167  | -132.94200 | -38.44133  | < <b>0.001</b> |
| Altitude (Alt)                      | SR-BZL  | 135.2273   | -193.8440  | 464.29856  | 0.576          |
|                                     | YR-BZL  | -159.5227  | -488.5940  | 169.54856  | 0.466          |
|                                     | YR-SR   | -294.7500  | -616.5881  | 27.08807   | 0.077          |
| Conductivity (Cond)                 | SR-BZL  | 95.89470   | 34.30936   | 157.48003  | < <b>0.001</b> |
|                                     | YR-BZL  | -7.67197   | -69.25731  | 53.91337   | 0.949          |
|                                     | YR-SR   | -103.56667 | -163.79831 | -43.33502  | < <b>0.001</b> |
| Water temperature (WT)              | SR-BZL  | -0.081818  | -2.142594  | 1.978957   | 0.994          |
|                                     | YR-BZL  | -0.881818  | -2.942594  | 1.178957   | 0.550          |
|                                     | YR-SR   | -0.800000  | -2.815478  | 1.215478   | 0.597          |
| Dissolved oxygen (DO)               | SR-BZL  | -0.1325758 | -0.4764341 | 0.2112826  | 0.614          |
|                                     | YR-BZL  | 0.1349242  | 0.1349242  | 0.4787826  | 0.604          |
|                                     | YR-SR   | 0.2675000  | -0.0688001 | 0.6038001  | 0.140          |
| Hydrogen ion concentration (pH)     | SR-BZL  | 0.4260606  | 0.2173285  | 0.6347928  | <b>0.001</b>   |
|                                     | YR-BZL  | 0.2410606  | 0.03232853 | 0.44979268 | <b>0.02</b>    |
|                                     | YR-SR   | -0.1850000 | -0.3891439 | 0.0191439  | 0.081          |
| Oxidation reduction potential (ORP) | SR-BZL  | 4.331061   | -21.26565  | 29.927772  | 0.909          |
|                                     | YR-BZL  | -12.085606 | -37.68232  | 13.511105  | 0.485          |
|                                     | YR-SR   | -16.416667 | -41.45074  | 8.617411   | 0.255          |
| Total nitrogen (TN)                 | SR-BZL  | 0.14265152 | 0.09862609 | 0.18667694 | < <b>0.001</b> |

|                                      |        |            |             |            |                |
|--------------------------------------|--------|------------|-------------|------------|----------------|
|                                      | SR-BZL | 0.07598485 | 0.07598485  | 0.12001027 | < <b>0.001</b> |
|                                      | YR-SR  | -0.0666666 | -0.10972438 | -0.0236089 | <b>0.001</b>   |
|                                      |        |            |             |            |                |
| Ammonia (NH3)                        | SR-BZL | 0.00102272 | 0.00102272  | 0.00526538 | 0.825          |
|                                      | YR-BZL | -0.0002272 | -0.0044699  | 0.00401538 | 0.990          |
|                                      | YR-SR  | 0.00289939 | -0.00289939 | 0.00289939 | 0.741          |
|                                      |        |            |             |            |                |
| Total phosphorus (TP)                | SR-BZL | 0.00873484 | -0.00859294 | 0.02606263 | <b>0.02</b>    |
|                                      | YR-BZL | -0.0065984 | -0.02392627 | -0.0239262 | 0.622          |
|                                      | YR-SR  | -0.0153333 | -0.03228024 | 0.00161357 | 0.082          |
|                                      |        |            |             |            |                |
| Dissolved oxygen concentration (DOC) | SR-BZL | -0.1286364 | -0.4327461  | 0.17547339 | 0.557          |
|                                      | YR-BZL | -0.3228030 | -0.6269128  | -0.6269128 | <b>0.03</b>    |
|                                      | YR-SR  | -0.1941667 | -0.4915919  | 0.10325854 | 0.258          |
|                                      |        |            |             |            |                |
| Chla                                 | SR-BZL | -0.0177976 | -0.2208717  | 0.1852765  | 0.974          |
|                                      | YR-BZL | 0.07525006 | -0.1278241  | 0.2783242  | 0.637          |
|                                      | YR-SR  | 0.09304767 | -0.1055627  | 0.2916581  | 0.490          |
|                                      |        |            |             |            |                |
| Total organic carbon (TOC)           | SR-BZL | -0.4987273 | -0.9566955  | -0.0407590 | <b>0.03</b>    |
|                                      | YR-BZL | -0.7908106 | -1.2487789  | -0.3328423 | < <b>0.001</b> |
|                                      | YR-SR  | -0.2920833 | -0.7399851  | 0.15581847 | 0.259          |
|                                      |        |            |             |            |                |
| Turbidity (Turb)                     | SR-BZL | -0.3727273 | -1.541133   | 0.7956781  | 0.715          |
|                                      | YR-BZL | -0.5893939 | -1.757799   | 0.5790114  | 0.439          |
|                                      | YR-SR  | -0.2166667 | -1.359390   | 0.9260563  | 0.887          |
|                                      |        |            |             |            |                |
| Silicon (Si)                         | SR-BZL | -0.7078485 | -1.1885486  | -0.2271483 | <b>0.002</b>   |
|                                      | YR-BZL | -1.0822652 | -1.5629653  | -0.6015650 | < <b>0.001</b> |
|                                      | YR-SR  | -0.3744167 | -0.8445507  | 0.09571735 | 0.139          |
|                                      |        |            |             |            |                |
| Width                                | SR-BZL | -0.9818182 | -1.64424929 | -0.3193871 | < <b>0.01</b>  |
|                                      | YR-BZL | 0.7265152  | 0.06408404  | 1.3889463  | <b>0.02</b>    |
|                                      | YR-SR  | 1.7083333  | 1.06046293  | 2.3562037  | < <b>0.001</b> |
|                                      |        |            |             |            |                |

|                        |        |            |            |            |       |
|------------------------|--------|------------|------------|------------|-------|
| Flow velocity (Flow-v) | SR-BZL | -0.0162121 | -0.1727890 | 0.14036472 | 0.964 |
|                        | YR-BZL | -0.1028787 | -0.2594556 | 0.05369805 | 0.254 |
|                        | YR-SR  | -0.0866666 | -0.2398018 | 0.06646850 | 0.357 |
