# Supplementary material for: Ephemeroptera (Mayflies) Assemblages and Environmental Variation along Three Streams Located in the Dry-Hot Valleys of Baima Snow Mountain, Yunnan, Southwest China
Source: MDPI journal article supplement (doi:10.3390/insects12090775), 2021-08-29
Supplement: s1 [file s1]

**Table S3.** Results of the parallel PERMANOVA and associated ANOVA in the RDA model for each environmental indicator.

| Factors  | Statistical test | PERMANOVA      |       | ANOVA          |                 |
|----------|------------------|----------------|-------|----------------|-----------------|
|          |                  | <i>P-value</i> | $R^2$ | <i>P-value</i> | <i>Variance</i> |
| Alt      |                  | 0.001          | 0.411 | < 0.001        | 17.74 %         |
| Cond     |                  | 0.001          | 0.217 | < 0.001        | 15.16 %         |
| TDS      |                  | 0.01           | 0.206 | < 0.001        | 9.09 %          |
| WT       |                  | 0.001          | 0.223 | 0.001          | 5.08 %          |
| DO       |                  | 0.03           | 0.097 | > 0.05         | 1.52 %          |
| PH       |                  | 0.03           | 0.191 | 0.02           | 3.93 %          |
| ORP      |                  | 0.001          | 0.109 | 0.08           | 2.68 %          |
| Si       |                  | 0.001          | 0.141 | 0.005          | 4.63 %          |
| TN       |                  | 0.001          | 0.226 | > 0.05         | 2.32 %          |
| NH3      |                  | > 0.05         | 0.015 | > 0.05         | 1.83 %          |
| TP       |                  | > 0.05         | 0.046 | > 0.05         | 1.75 %          |
| DOC      |                  | > 0.05         | 0.011 | > 0.05         | 2.01 %          |
| Chla     |                  | > 0.05         | 0.034 | > 0.05         | 1.05 %          |
| TOC      |                  | > 0.05         | 0.059 | > 0.05         | 1.64 %          |
| Width    |                  | > 0.05         | 0.108 | > 0.05         | 2.11 %          |
| Flow_V   |                  | > 0.05         | 0.003 | > 0.05         | 2.47 %          |
| Turb     |                  | 0.001          | 0.102 | > 0.05         | 1.98 %          |
| Residual |                  |                |       |                | 22.92 %         |
